# Supplementary material
Source: PubMed Central journal article supplement (PMC3570818)
Supplement: supp_WNL.0b013e318275963b_Table_e-2.pdf [file supp_WNL.0b013e318275963b_Table_e-2.pdf]

**Table e-2****PCR primers designed to amplify the 17 exons of *VCP* gene**

|            |                          |
|------------|--------------------------|
| VCPe1F     | CTTGCCACCGCTCGTAG        |
| VCPe1R     | TCCTGGTCTCCACCTCTCTG     |
| VCPe2-3F   | AAGTATGAGTTTTAGAGACTGGCG |
| VCPe2-3R   | CATGGGTCCTGCCTGTAATG     |
| VCPe4F     | CTTTTGGACACCCAGTGCTT     |
| VCPe4R     | TGTTCCAAGGTTTATTCCCTACA  |
| VCPe5Fb    | TCACTTTGTCTTGTAGTTGACACC |
| VCPe5Rb    | TACCACATGATGCCCACTG      |
| VCPe6F     | GAGAAACTCAGCTTTTGCTGATA  |
| VCPe6R     | GAAAGCCATGCATGAAAACA     |
| VCPe7F     | AAGCCTGATTCTCACCTCTC     |
| VCPe7R     | GCTCCAGCTCATAAGCCCAG     |
| VCPe8-9F   | ACCTGTCTCTGGGCCAAAC      |
| VCPe8-9R   | TGGACCCAATCACTGTGAAG     |
| VCPe10F    | GGTACCCTAGGCCTGTCTC      |
| VCPe10R    | GTCTCTAGCCAGTTCCCAGC     |
| VCPe11-12F | ATTGTCTCTGAGCCTCCTGC     |
| VCPe11-12R | CAGCAAATGTGTTGACACCC     |
| VCPe13F    | TAATGGAGGGGATGCTTCTG     |
| VCPe13R    | CAGTTGAGCAGCCAGCAC       |
| VCPe14F    | CCACCACGTTTGCCTAGAG      |
| VCPe14R    | AAAGAGCACTCCGTACCAGC     |
| VCPe15F    | GGTAGCCCAAAGATCTGC       |
| VCPe15R    | TCTACTCTCAACTCCAGGGC     |
| VCPe16-17F | GGAGGCCTGGGATGAAATC      |
| VCPe16-17R | ACCCCTGGTCCCTCTCC        |

**PCR conditions:**

95 °C for 5 minutes initially, followed by 30 cycles at 95 °C for 30 seconds, 65 °C for 30 seconds; with a -0.5 °C decrement of temperature per cycle, and 72 °C for 1 minute. Additionally, 15 cycles at 95 °C for 30 seconds, 65 °C for 30 seconds and 72 °C for 1 minute, as well as a final extension time of 7 minutes at 72 °C were added.

The high GC content of exon1 (75%) required the use of AccuPrime GC-Rich DNA

polymerase (Invitrogen cat no.12337-016).
